# Supplementary material
Source: PubMed Central journal article supplement (PMC4633784)
Supplement: CJN.02590315_CJN02590315SupplementaryData.pdf [file CJN.02590315_CJN02590315SupplementaryData.pdf]

Meredith C. Foster<sup>1</sup>, Josef Coresh<sup>2-4</sup>, Joseph V. Bonventre<sup>5</sup>, Venkata S. Sabbiseti<sup>5</sup>, Sushrut S. Waikar<sup>5</sup>, Theodore E. Mifflin<sup>6</sup>, Robert G. Nelson<sup>7</sup>, Morgan Grams<sup>2-4</sup>, Harold I. Feldman<sup>8</sup>, Vasan S. Ramachandran<sup>9</sup>, Paul L. Kimmel<sup>10</sup>, Chi-yuan Hsu<sup>11</sup>, and Kathleen D. Liu<sup>11</sup> for the CKD Biomarkers Consortium

1. Division of Nephrology, Department of Medicine, Tufts Medical Center, Boston, MA
2. Departments of Epidemiology and Biostatistics, Johns Hopkins Bloomberg School of Public Health, Baltimore, MD
3. Department of Medicine, Johns Hopkins Hospital, Baltimore, MD
4. The Welch Center for Prevention, Epidemiology and Clinical Research, Johns Hopkins Medical Institutions, Baltimore, MD
5. Division of Nephrology, Department of Medicine, Brigham and Women's Hospital, Harvard Medical School, Boston, MA
6. Department of Biostatistics and Epidemiology, Center for Clinical Epidemiology and Biostatistics, University of Pennsylvania, Philadelphia, PA
7. National Institute of Diabetes and Digestive and Kidney Diseases, National Institutes of Health, Phoenix, AZ
8. Department of Biostatistics and Epidemiology, Center for Clinical Epidemiology and Biostatistics, University of Pennsylvania, Philadelphia, PA
9. Section of Preventive Medicine and Epidemiology, Department of Medicine, Boston University, Boston, MA
10. National Institute of Diabetes and Digestive and Kidney Diseases, National Institutes of Health, Bethesda, MD
11. Division of Nephrology, Department of Medicine, University of California, San Francisco, San Francisco, CA
